1 **Quantifying climate change impacts emphasises the importance**  
2 **of managing regional threats in the endangered Yellow-eyed**  
3 **penguin**

4 Thomas Mattern<sup>1,2,\*</sup>, Stefan Meyer<sup>1</sup>, Ursula Ellenberg<sup>2</sup>, David M. Houston<sup>3</sup>, John  
5 T. Darby<sup>4</sup>, Melanie Young<sup>1</sup>, Yolanda van Heezik<sup>1</sup>, Philip J. Seddon<sup>1</sup>

6 <sup>1</sup> Department of Zoology, PO Box 56, University of Otago, Dunedin, New Zealand

7 <sup>2</sup> Department of Ecology, Environment and Evolution, La Trobe University, Melbourne,  
8 Australia

9 <sup>3</sup> Science and Policy Group, Department of Conservation, Private Bag 68 908, Newton,  
10 Auckland, New Zealand

11 <sup>4</sup> Otago Museum, PO Box 6202, Dunedin, New Zealand

12 Corresponding author: Thomas Mattern<sup>1,2</sup>

13 Email address: [t.mattern@eudyptes.net](mailto:t.mattern@eudyptes.net)

## 14 **Abstract**

15 Climate change is a global issue with effects that are difficult to manage at a regional scale.  
16 Yet more often than not climate factors are just some of multiple stressors affecting species  
17 on a population level. Non-climatic factors – especially those of anthropogenic origins –  
18 may play equally important roles with regard to impacts on species and are often more  
19 feasible to address. Here we assess the influence of climate change on population trends of  
20 the endangered Yellow-eyed penguin (*Megadyptes antipodes*) over the last 30 years, using a  
21 Bayesian model. Sea surface temperature (SST) proved to be the dominating factor  
22 influencing survival of both adult birds and fledglings. Increasing SST since the mid-1990s  
23 was accompanied by a reduction in survival rates and population decline. The population  
24 model showed that 33% of the variation in population numbers could be explained by SST  
25 alone, significantly increasing pressure on the penguin population. Consequently, the  
26 population becomes less resilient to non-climate related impacts, such as fisheries  
27 interactions, habitat degradation and human disturbance. However, the extent of the  
28 contribution of these factors to declining population trends is extremely difficult to assess  
29 principally due to the absence of quantifiable data, creating a discussion bias towards  
30 climate variables, and effectively distracting from non-climate factors that can be managed  
31 on a regional scale to ensure the viability of the population.

## 32 **Keywords**

33 Climate change, anthropogenic threats, population modelling, penguins, species  
34 management, demography, survival rates, New Zealand, conservation, endangered species

## 35 **Introduction**

36 Climate change significantly alters the phenology and distribution of the world's fauna and  
37 flora (Parmesan 2006). Species with spatially limited distributions suffer particularly from  
38 climate-related change in their habitats, which can drive range shifts (e.g. Sekercioglu et al.,  
39 2008; Grémillet & Boulinier, 2009), range restrictions (Sexton et al., 2009) or, in the worst  
40 case, extinction (Thomas et al., 2004). Current climate predictions suggest that the  
41 pressure on ecosystems will continue to increase (Stocker, 2014), especially affecting  
42 species that occupy fragmented habitats. The spatial segregation of suitable habitat might  
43 preclude range shift adjustments and increase the risk of local extinctions (Opdam &  
44 Wascher, 2004).

45 For species conservation, this creates a daunting scenario. With resources for conservation  
46 often limited, the inevitability of climate change could be used as an argument against  
47 taking action to conserve species at locations that may become sub-optimal due to  
48 environmental change (Sitas, Baillie & Isaac, 2009). However, often cumulative  
49 anthropogenic impacts (e.g. habitat destruction, pollution, resource competition, accidental  
50 mortality) significantly add to – or even exceed – the impact of climate-related  
51 environmental change (Parmesan & Yohe, 2003; Trathan et al., 2015). While climate  
52 change is a global issue that is difficult to tackle at a regional scale, addressing local-scale  
53 anthropogenic factors can enhance species' resilience to environmental change.  
54 Quantifiable data on climate variables are usually readily available through international  
55 and regional monitoring programmes (e.g. Kriticos et al., 2012), whereas this is generally  
56 not the case with other non-climate related data. Lack of monitoring or commercial

57 interests often prevent the compilation of data (e.g. Chen, Chen & Stergiou, 2003; Mesnil et  
58 al., 2009) which may be relevant to species survival. This creates the risk of an analytical  
59 bias towards climate impacts, thereby distracting from and potentially understating non-  
60 climate threats.

61 The population status of New Zealand's endemic Yellow-eyed penguin (YEP, *Megadyptes*  
62 *antipodes*) illustrates the complexity of this issue. YEP is a species of significant cultural and  
63 economic value for New Zealand (Seddon, Ellenberg & van Heezik, 2013). Particularly the  
64 tourism industry of the Otago Peninsula benefits from the presence of the birds with an  
65 annual contribution per breeding pair to the local economy estimated at about NZ\$250,000  
66 (Tisdell, 2007). Ensuring the survival of the species is therefore not only a matter of ethical  
67 considerations, but also of economic importance.

68 With an estimated 1,700 breeding pairs the YEP is one of the rarest penguin species world-  
69 wide (Garcia Borboroglu & Boersma, 2013). Compared to other penguins, the YEP's  
70 distributional range is fairly limited. About 60% of the species' population is thought to  
71 inhabit the sub-Antarctic Auckland and Campbell Islands, while the remaining ~40% breed  
72 along the south-eastern coastline of New Zealand's South Island (Seddon, Ellenberg & van  
73 Heezik, 2013). Genetic analyses revealed that there is virtually no gene flow between the  
74 sub-Antarctic and mainland YEP populations (Boessenkool et al., 2009a).

75 While little is known about the sub-Antarctic populations, mainland YEPs have received  
76 considerable scientific attention. The first comprehensive studies of breeding biology and  
77 population dynamics were carried out in the first half of the 20<sup>th</sup> century by Lance Richdale  
78 (Richdale, 1949, 1951, 1957). Interest in the species waned after Richdale's retirement

79 from active research, but was rekindled in the late 1970s (Darby, 1985). Regular  
80 monitoring of some breeding sites commenced in the early 1980s, and was expanded and  
81 intensified following a catastrophic die-off affected breeding adult penguins on the Otago  
82 Peninsula in the austral summer of 1989-90 (Efford, Spencer & Darby, 1994). Parts of the  
83 population have been monitored without interruption since 1982 resulting in a data set  
84 spanning more than three decades (Ellenberg & Mattern, 2012). A recent review of  
85 available information revealed that a steady decline of the population might have been  
86 masked by more intensive monitoring since the early 2000s (Ellenberg & Mattern, 2012).

87 Most New Zealand penguin species including YEPs are believed to have undergone  
88 significant population declines in the past century, with climate change suspected to be  
89 playing a major role (e.g. Cunningham & Moors, 1994; Peacock, Paulin & Darby, 2000). At  
90 the same time, penguin populations are exposed to numerous anthropogenic threats  
91 (Trathan et al., 2015). Climate variables and anthropogenic influences create a complex mix  
92 of factors that make it challenging to decipher the causation of population developments.

93 Using population data recorded between 1982 and 2015 from one of the YEP's mainland  
94 strongholds, we developed a population model that integrates observed population  
95 changes with key climatic variables. While climate data are readily available as continuous  
96 data sets, data on anthropogenic factors are often sparse or of low temporal and spatial  
97 resolution which inhibits quantitative analysis. We assess to which extent population  
98 trends can be attributed to climate change so as to highlight and discuss the likely  
99 importance of other, not readily quantifiable but more manageable threats.

## 100 **Methods**

### 101 **Species information**

102 The IUCN Red list classifies Yellow-eyed penguins as “Endangered” (BirdLife International  
103 2012), and they are listed as “Nationally Vulnerable” under the New Zealand Threat  
104 Classification System (Robertson et al., 2013). The three main subpopulations are  
105 estimated to range between 520-570 breeding pairs on the Auckland Islands, 350-540  
106 pairs on Campbell Island, and 580-780 pairs along New Zealand’s south-eastern coastlines  
107 and Stewart Island (Seddon, Ellenberg & van Heezik, 2013). On the mainland, the Otago  
108 Peninsula represents the species’ stronghold where numbers of breeding pairs in the past  
109 three decades have been as high as 385 in 1996, but have steadily declined over the last 20  
110 years to only 108 pairs in 2011 (Ellenberg & Mattern, 2012).

111 Yellow-eyed penguins breed in the austral summer (September-February) so that their  
112 annual breeding period spans the turn of the calendar year. Socialising and courtship in  
113 July marks the onset of a new breeding season that ends in March/April with annual moult  
114 and subsequent replenishing of resources in preparation for the next breeding season  
115 (Seddon, Ellenberg & van Heezik, 2013). Hence, we used austral year (i.e. July to June) to  
116 calculate means and for summarising annual statistics of demographic and environmental  
117 parameters.

### 118 **Study sites**

119 The Otago Peninsula penguin population has received considerable scientific attention in  
120 the past century, with Richdale conducting his seminal population research between 1936  
121 and 1954 (Richdale, 1949, 1951, 1957), followed by a string of projects from the 1980s

122 onwards addressing many aspects of the Yellow-eyed penguin's biology including  
123 phylogeny (e.g. Boessenkool et al., 2009b), breeding biology (e.g. Darby, Seddon & Davis,  
124 1990), diet (e.g. van Heezik, 1990), foraging ecology (e.g. Mattern et al., 2007), and  
125 conservation (e.g. (Ellenberg, Mattern & Seddon, 2013)). While Richdale conducted most of  
126 his work at Kumo Kumo Whero Bay, most of the recent research was carried out at the  
127 Boulder Beach complex (Fig 1) which, as a result, has the longest ongoing population  
128 monitoring program and the most reliable data set available (Ellenberg & Mattern, 2012).

### 129 **Population monitoring & Yellow-eyed penguin database (YEPDB)**

130 Flipper banding of Yellow-eyed penguins commenced at Boulder Beach in the 1970s and by  
131 the mid-1980s the majority of the local population was marked. Annual nest searches were  
132 conducted to determine number of breeders and repeated nest checks provided  
133 information on bird identity and reproductive success (Darby, 1985). After a catastrophic  
134 adult die-off during the 1989 breeding season (Gill & Darby, 1993), monitoring was  
135 intensified to include 60% of the known South Island breeding sites (Seddon, Ellenberg &  
136 van Heezik, 2013). The Yellow-eyed penguin database (YEPDB) was created in the early  
137 1990s (Efford, Spencer & Darby, 1994) and is maintained by the New Zealand Department  
138 of Conservation (DOC) which also maintains the YEP monitoring and banding program.  
139 While the use of subcutaneous transponders has been introduced in the monitoring  
140 population, DOC still maintains flipper bands as primary marking method for a transitional  
141 period to ensure data consistency can be maintained before phasing out banding.  
142 At the time of writing, the database contained banding records for 13,788 penguins (date  
143 range: 1973-2013), and 9,006 nest records (range: 1979-2014). It also holds information

144 on incidental penguin recoveries or sightings outside the breeding season; however, these  
145 recovery data are patchy and were deemed too unreliable for analysis.

## 146 **Data**

### 147 *Demographic data*

148 Nearly one third of all banding records (n=3,733) and nest records (n=2,342) originate  
149 from Boulder Beach (Fig 1) providing consistent, uninterrupted monitoring data for our  
150 analyses. While monitoring commenced in the late 1970s, first complete data sets are  
151 available from 1982 onwards, although for the first season there are only records of six  
152 nests.

153 Data were extracted from YEPDB as a series of SQL queries. Population numbers were  
154 retrieved from the table holding nest records. Number of breeding adults was calculated by  
155 multiplying the number of nests by two; number of fledglings is the sum of chicks fledged  
156 from all nests, and number of new breeders represents the sum of all adults that were  
157 recorded for the first time as breeders. Where possible we determined age of breeding  
158 birds per year by querying their banding details; age is unknown for birds banded as adults  
159 (ca. 15% of all banded birds).

160 To estimate demographic parameters, we first extracted ID numbers for individuals  
161 banded at the Boulder Beach complex since 1982. Secondly, we identified the years in  
162 which each bird was recorded as a breeding adult in the nest record table. Finally, we  
163 compiled the information from both database queries into a table where each column  
164 represented a nest year and rows comprised encounter histories for each individual. Birds  
165 had to miss at least two consecutive breeding seasons before being defined as dead or



166 senescent. In a small number of cases a bird was not recorded as a breeder for three or  
167 more consecutive years before reemerging as a nest occupant, but this applied to less than  
168 1% of all birds.

### 169 ***Environmental data***

170 We obtained monthly averages for selected climatic variables deemed likely to have an  
171 influence on demographic parameters (Table 1). The National Climate Database (CliFlo,  
172 <http://cliflo.niwa.co.nz>) has kept records from weather stations in Dunedin and the Otago  
173 Peninsula continuously since the early 20<sup>th</sup> century. Austral annual means were calculated  
174 for each parameter (i.e. July – June) as well as for the months March to May, which covers  
175 the penguins' annual moult and post-moult periods. During this time birds are particularly  
176 susceptible to environmental perturbations due the increased energy requirements for  
177 feather replacement (Croxall, 1982). Data on local sea surface temperatures (SST) were  
178 obtained from the Portobello Marine Laboratory (University of Otago) which holds a near  
179 continuous time series of daily measurements dating back to January 1953. We calculated  
180 the monthly SST anomaly by subtracting monthly means from the average value calculated  
181 from all monthly means ranging from January 1953 to December 2014; annual SST  
182 anomaly is the mean of monthly SST anomalies for the corresponding year. To examine for  
183 potential lag effects of SST anomaly on prey availability (Beentjes & Renwick, 2001), we  
184 also examined SST anomalies shifted backwards in time by one and two years.

### 185 **Population model**

186 We estimated adult survival and fledgling survival by developing a Bayesian mark-  
187 recapture (MR) model that incorporated effects of climate parameters. Chicks are only

188 banded shortly before fledging, so that the MR model could not consider hatchlings that  
189 died before they were marked (i.e. chick survival). Hence, fledgling survival was adjusted  
190 by incorporating the proportion of chicks fledged to chicks hatched. We modelled survival  
191 in any year as a random process ranging around a mean of zero within the bounds of a total  
192 temporal variance. This allowed us to determine the relative importance of each climate  
193 covariate in terms of percentage of total variance explained (Grosbois et al., 2008). For  
194 models with covariates explaining at least 20% of the total variance, we estimated  
195 posterior model probabilities using Gibbs Variable Selection (GVS, Tavecchia et al., 2016)  
196 Subsequently, we modelled YEP population dynamics via a female-only model assuming a  
197 birth-pulse population (Tang & Chen, 2002). The effect of environmental factors on the  
198 population growth rate was examined by using fixed survival rates (means) within the  
199 population model, allowing it to approximate the deterministic population growth rate  
200 between 1982 and 2014. Similarly, we estimated the population growth rate by changing  
201 mean survival rates corresponding to low SSTs that were measured from 1982 to 1996,  
202 and high SSTs characteristic for the time period from 1997 to 2015. Finally, we projected  
203 future populations by running a series of stochastic projections that used a range of  
204 survival rate estimates (i.e. omitting years with increasing uncertainty in estimate validity)  
205 and predicted trends in influential environmental factors.

206 Detailed descriptions of all modelling procedures are provided as Electronic  
207 Supplementary Material (ESM1).

## 208 **Comparison with historic population trends**

209 Richdale (1957) provides comprehensive data on penguin demography allowing it to draw  
210 comparisons between historic and contemporary penguin numbers. We inferred  
211 population parameters from three tables. Table 67 (p147) provides direct information  
212 about the number of eggs laid and chicks fledged. Using number of eggs, we inferred the  
213 number of nests for the reported years by assuming only two-egg clutches were present. In  
214 table 72 (p154), Richdale reports the percentage of surviving breeders of both sexes for  
215 each year, adjusted to the fractional format by dividing the reported values by 100. Finally,  
216 table 62 (p138) provides clues about annual recruitment, which was calculated as  
217 proportion of new breeders each year. We omitted Richdale's data for the 1936 season and  
218 for the seasons following 1949, as he noted less frequent monitoring and incomplete data  
219 sets for the initial and the latter years of his study (Richdale 1957).

## 220 **Results**

### 221 **Observed penguin numbers**

222 Numbers of adult breeders at Boulder Beach fluctuated considerably between 1982 and  
223 2015 (Fig 2). Immigration of birds that had been banded outside Boulder Beach was a rare  
224 occurrence throughout the study period (mean proportion of immigrants per year 1982-  
225 2015:  $2.7 \pm 2.2\%$ ). If birds banded as breeders are considered to have come from other  
226 breeding sites, the median immigration is similar (2.0%) although three years (1991, 2010  
227 and 2012) would stand out where unbanded adults made up 11, 10 and 8% of the breeding  
228 population, respectively. An apparent rise in penguin numbers at the beginning of the  
229 monitoring period (i.e. 1982-1985) reflects increasing monitoring effort. Reduced

230 monitoring effort may explain the drop in numbers after 1985-86; two areas were not  
231 monitored in several years (A1: 1986-1989; Highcliff: 1989). Both areas account for  $46 \pm 4\%$   
232 of penguin counts (1990-2015), so that true penguin numbers in 1989 were likely  
233 considerably higher than the database would suggest. Breeder numbers in the two areas  
234 monitored in 1989 (Midsection; Double Bay) dropped by 62% in the following season  
235 (1989: 74 birds, 1990: 28 birds) when the population was affected by a catastrophic adult  
236 die-off. The population recovered between 1990 and 1996 to reach levels comparable to  
237 those observed in 1985. The 1996 season had the highest numbers of breeders recorded at  
238 Boulder Beach ( $n=242$ ) and represents a turning point for the population. Subsequently  
239 penguin numbers reached a low of 104 breeders in 2002, with losses compounded by  
240 another adult die-off event occurring in the 2001 season. Between 2002 and 2012 the  
241 population fluctuated between 100 and 150 breeders without any apparent trend before  
242 another drastic decline in numbers began in the years following a third adult die-off event  
243 at the end of the 2012 season. The steepest drop in numbers (41%) recorded since 1989  
244 occurred between 2013 (128 breeders) and 2014 (76 breeders). In 2015, only 58 breeding  
245 penguins were recorded, which translates to a 76% decline in numbers since 1996.

246 Number of chicks that fledged each year generally followed the trends observed for adults  
247 (Fig. 2). However, significant variation between 2003 and 2010 reflects a series of years  
248 with poor breeding success followed by better reproductive output in the following year.  
249 Numbers of new breeders showed a similar albeit weakened pattern delayed by 5 years:  
250 starting in 2004, numbers of new breeders seem to mimic those of fledglings beginning in  
251 1999.

252 Age of breeding birds ranged between 8.4 years (1984) and 14.9 years (1990, mean:  
253  $12 \pm 1.4$  years, Fig. 3). Between 1990 and 2015 the average age of returning breeders  
254 showed a slightly decreasing trend from around 14 to 11 years (Pearson correlation  $\rho = -$   
255  $0.307$ ,  $t_{24} = -1.5781$ ,  $p = 0.13$ ). At the same time, average age of new breeders dropped  
256 significantly from more than 10 years in the 1990s to only 4 years in 2015 ( $\rho = -0.796$ ,  $t_{24} = -$   
257  $1.5781$ ,  $p < 0.001$ ). The average age of new breeders increased steeply after both the 1989  
258 and 2001 adult die-offs (Fig 3) indicating a substantial pool of older non-breeders ready to  
259 recruit following the disappearance of established breeders. No such spike is apparent after  
260 the 2012 die-off suggesting that the pool of older recruits has dried up over the last decade.

### 261 **Demographic estimates from the mark-recapture model**

262 The MR model without covariate revealed a fledgling survival rate of 0.12 (95%, Credible  
263 Interval: 0.08, 0.19) in chicks (Table 2). The survival of adults was 0.87 (95%, CrI: 0.83,  
264 0.90). Throughout the study period (1982-2014), fledgling survival varied 2.56 times more  
265 than adult survival (95%, CrI: 1.03, 6.45) (Table 2).

266 Years with increased wind activity had a positive effect on fledgling survival, whereas the  
267 effect of higher than normal SST was negative; both covariates explained 33.2% of the  
268 variance (Table 3a, ID 1 & 2). Similarly, SST anomaly during the first three months after  
269 fledging as well as in the previous year both had a negative effect on survival, explaining  
270 24.8% and 17.4% of the variance (IDs 3 & 4), while increased wind activity in the months  
271 after fledging had a positive effect on fledgling survival (16.5% of variance explained, ID 5).  
272 Furthermore, years with above average air temperatures had a negative effect on fledgling  
273 survival, explaining 12.4% and 15.4% of the variance (IDs 6 & 7).

274 In adults, SST had the greatest effect on the survival rate, explaining 36.8% of the variance  
275 (Table 3b, ID 1). The relationship of adult survival and SST becomes apparent when the  
276 deviation of annual adult survival from the median survival rate is plotted against SST  
277 anomaly (Fig 4). In periods with cooler than usual SST, adult survival was high (e.g.1990-  
278 1996), whereas warm periods were characterized by lower adult survival. The same was  
279 true for air temperature. Warmer years were associated with reduced adult survival; air  
280 temperature-related covariates explained 34.4% of the variation in adult survival (Table  
281 3b, IDs 2 & 3).

282 Refitting the MR model with the two most influential explanatory covariates each for  
283 fledging and adult survival, and subsequent assessment of posterior model probability,  
284 ranked highest the model where both chick and adult survival were fitted to the single  
285 covariate SST anomaly (Table 4).

## 286 **Predictions for the adult female population**

287 Using year-specific survival rates from the MR model generates predictions of numbers of  
288 adults that were similar to those determined during monitoring. For most years, the  
289 observation-based number of adult female YEPs and the 95% credible intervals for the  
290 predicted number of adult female YEPs overlapped (Fig 5).

291 Based on a deterministic model (i.e. without temporal variance in survival rates) the  
292 population growth rate was 1.02 (95% CrI 0.98, 1.06) per year throughout the entire study  
293 period. For the time period when SST was below average (1982 to 1996, Fig. 4) the  
294 population showed an increasing trend with a growth rate of 1.038 (95% CrI 0.99, 1.080,  
295 Fig 6). However, from 1996 onwards an ongoing period of mainly warmer than normal SST

296 went along with a growth rate of 0.94 (95% CrI 0.90, 0.98) indicating a population decline  
297 (Fig 6).

## 298 **Future projections**

299 Based on projections of increasing SST at a rate of 0.02°C per year in the next decades  
300 (Oliver et al. 2014), the penguin population at Boulder Beach will continue to decline.  
301 Stochastic simulations using the most reliable estimates for adult survival (1982-2012)  
302 suggest that the number of adult female penguins will drop below 10 individuals by 2048  
303 (Fig 5a). If the recent poor breeding years 2013-2015 are included this negative trend gets  
304 progressively worse (Fig 5b-d). Including adult survival rates estimated for 2015, the mean  
305 projection predicts YEPs to be locally extinct by 2043.

## 306 **Discussion**

307 Numbers of Yellow-eyed penguins at Boulder Beach have declined since 1996 (Figs 5&6).  
308 The local population seemed to experience a reprieve from this decline in the first decade  
309 of the new millennium, despite unfavourable climatic conditions at that time. This might  
310 have been driven by a temporary reduction in other, non-climate negative impacts, the  
311 nature of which remain unclear due to a lack of data.

312 The ages of breeding penguins provide some explanation about the underlying mechanics  
313 of the population decline. In the years following the 1989 and 2001 adult die-offs, the  
314 average age of new breeders recruited into the population was substantially higher than in  
315 the years prior to the events. All of these birds were locally banded individuals, which  
316 suggests that there was a pool of older, previously unpaired birds which replaced  
317 experienced breeders that had died during the event. After the 2012 die-off, the mean age

318 of new breeders reached an historic low (4.1 years, Fig 3). Hence, old breeders that had lost  
319 their partner now paired up with younger penguins indicating that the pool of older non-  
320 breeders available to replace lost birds had disappeared. This is supported by the number  
321 of recruits reflecting the marked variation in fledgling numbers with a 5-year-lag (Fig 2). It  
322 appears that since the turn of the century, penguins recruit into the breeding population at  
323 the earliest possible opportunity. This likely has negative effects on breeding performance  
324 since in seabirds age is an important determinant for foraging success (e.g. Daunt et al.,  
325 2007; Zimmer et al., 2011) and subsequently reproductive success (e.g. Limmer & Becker,  
326 2009; Nisbet & Dann, 2009). The decline in the mean age of new breeders in recent years  
327 indicates that more inexperienced birds are recruiting as breeders, and possibly explains  
328 the overall deteriorating reproductive success.

329 When the 2012 die-off of adult breeding birds occurred, penguin numbers were less than  
330 60% of what they had been in the mid-1990s (Fig 2). While the penguin population showed  
331 a remarkable recovery after the 1989 event this did not happen following 2012; instead  
332 numbers have continued to decline. The most apparent differences following the two die-  
333 offs are the trends in ocean temperatures with a cooler-than-normal period in the first half  
334 of the 1990s whereas SST has been almost continuously higher than the 1953-2014  
335 average since the late 1990s (Fig 4).

### 336 **Sea surface temperature effects**

337 Sea surface temperature explained 33% of the variation in observed population trends.  
338 Hence, SST has an important influence on YEP population trends. Years with warmer than  
339 usual SST result in reduced adult survival, whereas the reverse is true when SST is cooler.



340 Variation in SST likely influences the abundance and quality of YEP prey. In Little penguins  
341 (*Eudyptula minor*) breeding on the Otago Peninsula, climatic fluctuations – and connected  
342 to this, ocean temperatures – were found to affect prey composition (Perriman et al., 2000).  
343 Little penguins are generalist foragers that take a variety of pelagic prey (Dann, 2013),  
344 most likely a beneficial trait in relation to climate related change in resource abundance  
345 (Thuiller, Lavorel & Araújo, 2005). YEPs on the other hand, are principally benthic foragers  
346 (Mattern et al., 2007) that feed predominantly on demersal species (e.g. van Heezik, 1990;  
347 Moore & Wakelin, 1997; Browne et al., 2011). Although this specialisation reduces  
348 competition for pelagic prey with the abundant marine avifauna in New Zealand (Mattern  
349 et al., 2007), it comes at the cost of reduced behavioural flexibility to respond to changes in  
350 prey distribution or abundance (e.g. Browne et al., 2011; Mattern et al., 2013).

351 Temperature affects the annual biomass of many fish species in New Zealand (Beentjes &  
352 Renwick, 2001). Warmer than normal conditions negatively affect spawning in fish,  
353 reducing subsequent recruitment (e.g. Takasuka, Oozeki & Kubota, 2008). Abundance of  
354 the demersal Red cod (*Pseudophycis bacchus*), historically an important prey species for  
355 YEP from Boulder Beach (van Heezik, 1990; Moore & Wakelin, 1997), shows a strong  
356 correlation to SST fluctuations, albeit with a lag of 14 months (Beentjes & Renwick, 2001).  
357 At Boulder Beach, a reduction in body mass of breeding YEPs in 1985 when compared to  
358 1984 was associated with lower quantities of red cod taken (van Heezik & Davis, 1990).  
359 1983 featured cooler than normal SST (mean monthly SST anomaly: -0.73), while 1984  
360 temperatures were above average (SST anomaly: 0.17). As such the lagged correlation  
361 between SST and red cod abundance reported by Beentjes & Renwick (2001) also seems to  
362 be manifested in penguin body condition. This explains the relative importance of the

363 corresponding covariate (i.e. sst\_anomaly\_minus1year) for survival rates (Table 3a&b) and  
364 corresponds to findings of a previous analysis of climate variables on YEP numbers  
365 (Peacock, Paulin & Darby, 2000).

366 However, model selection showed an even stronger direct SST effect (Table 4). Ocean  
367 temperatures play an important role in the spatial distribution of fish populations  
368 (Beentjes et al., 2002). Warmer than usual SST is often an indication of increased  
369 stratification of the water column where a layer of warmer water sits on top of cooler  
370 water. This disrupts the benthic-pelagic coupling, i.e. mixing processes that regulate  
371 nutrient flow between benthos and surface waters (Jones et al., 2014). Land run-off has  
372 been identified as a major source of nutrients for the South Otago continental shelf, which  
373 results in higher near-surface nutrient concentrations (Hawke, 1989), so that vertical  
374 mixing is likely of crucial importance for benthic productivity and subsequent prey  
375 abundance in the penguins' home ranges. Penguin foraging conditions are likely  
376 compromised under stratified, warm-water conditions.

377 The three major die-offs of adult penguins (seasons 1989-90, 2001-02, and 2012-13) all  
378 occurred in years with higher than normal SST suggesting that stratification might have  
379 more severe impacts than can be explained by the disruption of nutrient fluxes alone.

### 380 **SST and relevance of die-off events**

381 Die-off events do not seem to be related to prey availability; body condition of adult  
382 penguins examined during the 1989 event did not indicate malnutrition (Gill & Darby,  
383 1993). The cause of mortality could not be identified although necropsies after the 2012  
384 die-off indicated it to be toxin related (Gartrell et al., 2016). Harmful algal blooms (HAB)

385 that are known to have negative impacts on other penguin species (Shumway, Allen &  
386 Boersma, 2003) were suspected to be involved in the die-offs as well (Gill & Darby, 1993).  
387 Yet water samples taken along a transect through the penguin's known foraging ranges  
388 found no evidence for the presence of harmful algae (Mattern et al, unpublished data).  
389 Tests for the presence of marine biotoxins in freshly dead birds were negative (Gartrell et  
390 al., 2016). Moreover, it seems unlikely that a HAB would selectively affect only one seabird  
391 species (Shumway, Allen & Boersma, 2003); no other unexplained seabird deaths occurred  
392 during any of the die-offs. Only bottom foraging YEPs were affected suggesting that the  
393 distribution of a toxin was probably limited to the near-seafloor region. Stratification and  
394 the disruption of vertical mixing potentially would contribute to a concentration of toxic  
395 components at the sea floor. While the origin or exact nature of the toxin remains unclear,  
396 it could be related to technical malfunctions that occurred at the time at Dunedin's sewage  
397 treatment plant, which discharges at the seafloor about 1.5 km from the shore and ca. 5 km  
398 upstream from Boulder Beach (Dunedin City Council, unpublished data).

399 Although the cause of die-off events remains a matter of speculation, their relevance for  
400 population trends is closely tied to prevalent environmental conditions following these  
401 events. The 1989 die-off, which removed about 50% of penguins from the breeding  
402 population (Efford, Spencer & Darby, 1996) was followed by a six year period of population  
403 recovery, likely aided by cooler than normal SST (Fig. 4). The next die-off event occurred at  
404 Boulder Beach in 2001 (Alvin Setiawan, pers. comm.) and reduced the local population by  
405 nearly 40%. Following this event, the population showed no sign of recovery during a  
406 prolonged period of warmer-than-normal SST that began in 1998 and prevails until today.  
407 The associated reduced adult survival explains the lack of recovery in the penguin

408 population. Consequently, the 2012 die-off had a cumulative effect, further reducing the  
409 population to its lowest level on record.

410 With projected SST increases over the next decades it seems doubtful that optimal marine  
411 conditions supporting the recovery of YEPs will occur in the future. Hence, future die-off  
412 events will be increasingly critical for penguin numbers. However, sea surface  
413 temperatures only explained about one third of the variation in survival rates. This means  
414 that other factors also play important roles for YEP population dynamics.

### 415 **Other climate factors**

416 Daily minimum air temperature is a proxy for prevailing temperature regimes, where a  
417 higher average minimum temperature indicates warmer years. Air temperature could  
418 simply be a covariate of SST and affect penguin survival through the mechanisms suggested  
419 above. In addition, air temperatures recorded during the moult (March-May) negatively  
420 affected adult survival probably as a result of hyperthermia. Little penguins in Australia  
421 suffer increased adult mortality when exposed to higher temperatures when moulting  
422 (Ganendran et al., 2015). However, there is no evidence for comparable temperature-  
423 related mortality events in YEP

424 Frequency of days with strong winds had a positive influence on fledgling survival. Wind  
425 aids oceanic mixing processes and thereby can become a driver for foraging success in  
426 penguins (Dehnhard et al., 2013). Wind generally acts as an antagonist to SST-related  
427 stratification effects, creating enhanced foraging conditions for penguins thereby  
428 increasing the survival chances of inexperienced fledglings.

## 429 **Non-climate factors**

430 In this study we were able to use comprehensive data to test the influence of a wide range  
431 of climate related factors on the population developments of Yellow-eyed penguins from  
432 Boulder Beach. Yet only about a third of the variation in penguin numbers can be explained  
433 by climate factors. Hence, it is clear that other, non-climate factors significantly affect  
434 penguin survival rates. While several of these factors are well known, it is impossible to  
435 examine their impact on the penguin population in a modelling context due to a lack of any  
436 quantifiable data. At the same time, unlike the effects of climate change, at least some of  
437 these non-climatic factors could be managed on a regional scale to enhance the species'  
438 chance for survival. Therefore it is imperative to discuss some of these non-climate factors  
439 to avoid an undue focus on only the quantifiable factors (i.e. those driven by climate  
440 change) and direct conservation management towards measures that can ensure  
441 persistence of the Yellow-eyed penguin on the New Zealand mainland.

## 442 ***Fisheries interactions***

443 Potential impacts of incidental bycatch in gill net fisheries (Darby & Dawson, 2000) and  
444 alteration of the penguins' benthic foraging habitat by bottom fishing activities (Ellenberg  
445 & Mattern, 2012; Mattern et al., 2013) could not be quantified because data on gill net  
446 fisheries supplied by the Ministry of Primary Industries (NZ Ministry Of Primary Industries,  
447 Official Information Act Request OIA12-397) proved to be spatially coarse and temporally  
448 limited, with approximate locations of gill net fishing events specified only from 2006  
449 onwards. Provided data on bottom fishing effort only covered the years 2000-2012 and  
450 originated from vessels operating outside the penguins' ranges (OIA12-460).

451 The impact of single fisheries interactions might have a much greater effect on penguin  
452 numbers than annual fishing statistics would suggest. There are reports of multiple YEP  
453 killed in a single gill net haul (Ellenberg & Mattern, 2012) and reported bycatch incidents in  
454 gill net fisheries have been as high as 12 cases per year, many of which affected YEPs from  
455 the Otago Peninsula (Darby & Dawson, 2000). Currently, less than 2% of gill net effort in  
456 New Zealand is being independently observed (Richard & Abraham, 2015); this lack of  
457 observer coverage prevents reliable quantification of bycatch mortality. Yet it stands to  
458 reason that incidental fisheries mortality is an important factor affecting penguin survival  
459 rates and, hence, population trends.

460 Impacts of bottom fishing activities on YEP survival are even more difficult to quantify.  
461 Bottom trawling and dredge fisheries can substantially alter the benthic environment,  
462 reducing biodiversity, and prey abundance and quality for YEPs (Ellenberg & Mattern,  
463 2012). Low quality prey were brought ashore by YEPs on Stewart Island, which had home  
464 ranges that apparently avoided the vast areas of potential habitat subject to intensive  
465 oyster dredging (Browne et al., 2011; Ellenberg & Mattern, 2012). On the Otago Peninsula,  
466 some penguins forage along straight-line paths following bottom trawl scrape marks,  
467 searching for scavenging prey that appears to be inadequate food for young chicks  
468 (Mattern et al., 2013).

#### 469 ***Disease outbreaks***

470 In the past decade several breeding seasons saw the occurrence of diphtheritic stomatitis,  
471 a secondary infection negatively affecting chick survival (Houston & Hocken, 2005). We  
472 could not test the effects of such disease outbreaks on population trends, because the YEP

473 database does not facilitate quantitative storage of disease-related data. Diphtheritic  
474 stomatitis only affects chicks which generally survive when older than 2 weeks (Alley et al.,  
475 2016). So the disease is unlikely to have a lasting effect on population trends as it does not  
476 affect adults which are critical for the maintenance of a stable population (Benton & Grant,  
477 1999). Although YEPs are subject to exposure to avian malaria parasites (Graczyk et al.,  
478 1995), observed infections are low, hence, avian malaria currently does not present a  
479 significant problem for the species (Sturrock & Tompkins, 2007). Avian pox which is  
480 caused significant mortality events in Magellanic (*Spheniscus magellanicus*) and possibly  
481 Gentoo penguins (*Pygoscelis papua*) has not been observed in Yellow-eyed penguin,  
482 although diphtheritic stomatitis may be the result of a secondary bacterial infection caused  
483 by a poxvirus (Alley et al., 2016).

#### 484 ***Predators***

485 Introduced terrestrial predators are one of the biggest challenges for native wildlife in New  
486 Zealand (Wilson, 2004). Mustelids (*Mustela sp.*), dogs (*Canis lupus familiaris*), and to a  
487 lesser extent cats (*Felis catus*) and rats (*Rattus sp.*) can impact on YEP (e.g. Alterio, Moller &  
488 Ratz, 1998; Ratz & Murphy, 1999), but it is very difficult to quantify these effects because  
489 direct evidence of predation is sparse. A five year study investigating the impact of feral  
490 cats on penguins on Stewart Island did not find any indication for predation events and  
491 concluded that starvation and disease were the main factor of mortality (King, 2008). On  
492 the mainland, predation by dogs or stoats appear to be very localised occurrences (Hocken,  
493 2005). However, climate change may render this an increasing problem in the future  
494 (Tompkins, Byrom & Pech, 2013)

495 Predation by the native NZ sea lion (*Phocarctos hookeri*) has to date been limited to two  
496 female sea lions that were active between 1997 and 2005 (Lalas et al., 2007) that have  
497 since died (Jim Fyfe, pers. com.). More recently, a number of YEPs have been reported with  
498 injuries that were speculated to have been inflicted by Barracouta (*Thyrssites atun*).  
499 Considering that barracouta are smaller than adult YEPs (mean body lengths – barracouta:  
500 55 cm, Fishbase.org 2016; YEPs: 65 cm, Seddon, Ellenberg & van Heezik, 2013) such  
501 injuries are at best an accidental consequence of penguins and fish targeting the same prey  
502 patch. Some external injuries might be the result of interactions with humans; in Australia,  
503 Little penguins (*Eudyptula minor*) have been injured and killed by water craft such as jet  
504 skis (Cannell et al., 2016), a recreational activity that has also been observed in the penguin  
505 landing zone at Boulder Beach (pers. obs).

### 506 ***Human impacts***

507 The significance of human impacts in the form of deforestation of breeding habitat, capture  
508 by collectors, egging, and shooting of adults on the YEP population was highlighted early by  
509 Richdale (1952). While these impacts are no longer an issue, unregulated tourism has  
510 become an important threat at some Yellow-eyed penguin colonies and is reflected in  
511 reduced breeding performance and a steady decline of local penguin numbers (e.g.  
512 McClung et al., 2004; Ellenberg et al., 2007; Ellenberg, Mattern & Seddon, 2009).

### 513 **Maladapted colonizer?**

514 Comprehensive analysis of ancient penguin DNA in recent years have revealed that YEP is  
515 relatively recent colonizer originating from sub-Antarctic. The species is believed to have  
516 replaced a sister taxon *Megadyptes waitaha* after it was hunted to extinction by humans as



517 recently as 500 years ago (Boessenkool et al., 2009b; Rawlence et al., 2015). In this light,  
518 the question was raised whether the species' vulnerability to increasing ocean  
519 temperatures may in fact reflect a maladaptation for a warmer climate (Waters & Grosser,  
520 2016). While evidence for a physiological relationship between ocean warming and  
521 survival rates in YEP is lacking, the specialized benthic foraging strategy renders the  
522 species particularly sensitive to environmental change (Mattern et al., 2007; Gallagher et  
523 al., 2015). With the various non-climatic factors discussed above all contributing to  
524 significant shifts across the entire benthic ecosystem, reducing the penguins' struggle to a  
525 species-specific maladaptation for a warming climate clearly oversimplifies the matter.

## 526 **Conservation implications**

527 Stochastic simulations of future population trends for Yellow-eyed penguins at Boulder  
528 Beach, show that the population will continue to decline if current threats continue  
529 unabated. Global ocean temperatures are rising (Stocker, 2014); projections for the  
530 Tasman region until 2060 predict an increase in SST of up to 2°C (Oliver et al., 2014), hence  
531 future climatic conditions will not be favorable for a recovery of the YEP population.

532 On the bright side, climate change-related pressure on YEP can likely be offset through  
533 control of the other more manageable factors negatively affecting population trends. This  
534 has already been demonstrated: positive YEP population growth during the 1940s, at a  
535 time when SST was strongly increasing in the Pacific to levels comparable to those  
536 recorded in the 1990s (Guan & Nigam, 2008), was attributed to a reduction in human  
537 impacts such as conversion of breeding habitat to farm land, establishment of road  
538 networks, road traffic and random acts of violence (Richdale, 1957). During World War II,

539 when resources were directed towards the war effort, ‘man’s destructive agencies were  
540 practically negligible’ (Richdale, 1957, p157).

541 While climate change is a global phenomenon that is both inevitable and quantifiable, it is  
542 important to bear in mind its impact on species population trends is relative to other more  
543 regional factors, such as, in the case of penguins, fisheries, pollution, habitat destruction,  
544 introduced terrestrial predators, and human disturbance (Trathan et al., 2015). Managing  
545 local and regional factors can increase the resilience of species towards increasing pressure  
546 from climate change.

547 The virtual absence of quantifiable data to examine the effects of non-climate factors makes  
548 it difficult to provide fact-based management recommendations and puts a potentially  
549 overbearing emphasis on climate change. However, these principally anthropogenic factors  
550 likely also explain significant portions of the variation in survival rates, so that the focus  
551 should be on improving our understanding and management of these impacts to enhance  
552 this species’ resilience to climate change.

## 553 **Acknowledgements**

554 We would like to extend our gratitude to the many field workers and students involved in  
555 penguin monitoring that contributed data to the YEPDB. Special thanks are due to Bruce  
556 McKinlay, Jim Fyfe, and Jim Watts from the Department of Conservation Coastal Otago  
557 office for their efforts to maintain a regular monitoring schedule in the face of limited  
558 resources within the department.

## 559 **References**

- 560 Alley M., Suepaul R., McKinlay B., Young M., Wang J., Morgan K., Hunter S., GArtrell B. 2016.  
561 Diphtheritic stomatitis in Yellow-eyed penguins (*Megadyptes antipodes*) in New Zealand.  
562 *Journal of Wildlife Diseases* 53:102–110.
- 563 Alterio N., Moller H., Ratz H. 1998. Movements and habitat use of feral house cats *Felis catus*, stoats  
564 *Mustela erminea* and ferrets *Mustela furo*, in grassland surrounding yellow-eyed penguin  
565 *Megadyptes antipodes* breeding areas in spring. *Biological Conservation* 83:187–194.
- 566 Beentjes MP., Bull B., Hurst RJ., Bagley NW. 2002. Demersal fish assemblages along the continental  
567 shelf and upper slope of the east coast of the South Island, New Zealand. *New Zealand Journal*  
568 *of Marine and Freshwater Research* 36:197–223.
- 569 Beentjes MP., Renwick JA. 2001. The relationship between red cod, *Pseudophycis bachus*,  
570 recruitment and environmental variables in New Zealand. *Environmental Biology of Fishes*  
571 61:315–328.
- 572 Benton TG., Grant A. 1999. Elasticity analysis as an important tool in evolutionary and population  
573 ecology. *Trends in Ecology & Evolution* 14:467–471. DOI: 10.1016/S0169-5347(99)01724-3.
- 574 Boessenkool S., Star B., Waters JM., Seddon PJ. 2009a. Multilocus assignment analyses reveal  
575 multiple units and rare migration events in the recently expanded yellow-eyed penguin  
576 (*Megadyptes antipodes*). *Molecular Ecology* 18:2390–2400.
- 577 Boessenkool S., Austin JJ., Worthy TH., Scofield P., Cooper A., Seddon PJ., Waters JM. 2009b. Relict or  
578 colonizer? Extinction and range expansion of penguins in southern New Zealand. *Proceedings.*  
579 *Biological sciences / The Royal Society* 276:815–821.
- 580 Browne T., Lalas C., Mattern T., Van Heezik Y. 2011. Chick starvation in yellow-eyed penguins:

- 581 Evidence for poor diet quality and selective provisioning of chicks from conventional diet  
582 analysis and stable isotopes. *Austral Ecology* 36:99–108. DOI: 10.1111/j.1442-  
583 9993.2010.02125.x.
- 584 Cannell BL., Campbell K., Fitzgerald L., Lewis JA., Baran IJ., Stephens NS. 2016. Anthropogenic  
585 trauma is the most prevalent cause of mortality in Little Penguins, *Eudyptula minor*, in Perth,  
586 Western Australia. *Emu* 116:52–61. DOI: 10.1071/MU15039.
- 587 Chen Y., Chen L., Stergiou KI. 2003. Impacts of data quantity on fisheries stock assessment. *Aquatic*  
588 *Sciences* 65:92–98. DOI: 10.1007/s000270300008.
- 589 Croxall JP. 1982. Energy costs of incubation and moult in petrels and penguins. *The Journal of*  
590 *Animal Ecology*:177–194.
- 591 Cunningham DM., Moors PJ. 1994. The Decline of Rockhopper Penguins *Eudyptes chrysocome* at  
592 Campbell Island, Southern Ocean and the Influence of Rising Sea Temperatures. *Emu* 94:27–  
593 36.
- 594 Dann P. 2013. Little Penguin (*Eudyptula minor*). In: Garcia Borboroglu P, Boersma PD eds.  
595 *Penguins: Natural History and Conservation*. Seattle & London: University of Washington Press,  
596 304–319.
- 597 Darby JT. 1985. The great yellow-eyed penguin count. *Forest & Bird* 16:16–18.
- 598 Darby JT., Dawson SM. 2000. Bycatch of yellow-eyed penguins (*Megadyptes antipodes*) in gillnets in  
599 New Zealand waters 1979–1997. *Biological Conservation* 93:327–332.
- 600 Darby JT., Seddon PJ., Davis LS. 1990. Breeding biology of Yellow-eyed Penguins (*Megadyptes*  
601 *antipodes*). In: Davis LS., Darby, JT. eds. *Penguin Biology*. San Diego, California: Academic  
602 Press,.

- 603 Daunt F., Wanless S., Harris MP., Money L., Monaghan P. 2007. Older and wiser: improvements in  
604 breeding success are linked to better foraging performance in European shags. *Functional*  
605 *Ecology* 21:561–567.
- 606 Dehnhard N., Ludynia K., Poisbleau M., Demongin L., Quillfeldt P. 2013. Good Days, Bad Days: Wind  
607 as a Driver of Foraging Success in a Flightless Seabird, the Southern Rockhopper Penguin. *PLoS*  
608 *ONE* 8:e79487. DOI: 10.1371/journal.pone.0079487.
- 609 Efford MG., Spencer N., Darby JT. 1994. *A relational database for Yellow-eyed penguin banding and*  
610 *breeding records*. unpublished report: Landcare Research, Dunedin, New Zealand.
- 611 Efford MG., Spencer NJ., Darby JT. 1996. *Population studies of Yellow-eyed penguins - 1994-94*  
612 *progress report*. unpublished report: Department of Conservation, Wellington, New Zealand.
- 613 Ellenberg U., Setiawan AN., Cree A., Houston DM., Seddon PJ. 2007. Elevated hormonal stress  
614 response and reduced reproductive output in Yellow-eyed penguins exposed to unregulated  
615 tourism. *General and comparative endocrinology* 152:54–63.
- 616 Ellenberg U., Mattern T. 2012. *Yellow-eyed penguin - review of population information*. Wellington,  
617 New Zealand: Department of Conservation. DOI: 10.13140/RG.2.2.21606.83523.
- 618 Ellenberg U., Mattern T., Seddon P. 2009. Habituation potential of yellow-eyed penguins depends on  
619 sex, character and previous experience with humans. *Animal Behaviour* 77:289–296. DOI:  
620 10.1016/j.anbehav.2008.09.021.
- 621 Ellenberg U., Mattern T., Seddon PJ. 2013. Heart rate responses provide an objective evaluation of  
622 human disturbance stimuli in breeding birds. *Conservation Physiology* 1:cot013.
- 623 Gallagher AJ., Hammerschlag N., Cooke SJ., Costa DP., Irschick DJ. 2015. Evolutionary theory as a tool  
624 for predicting extinction risk. *Trends in ecology & evolution* 30:61–65.

- 625 Ganendran LB., Sidhu LA., Catchpole EA., Chambers LE., Dann P. 2015. Effects of ambient air  
626 temperature, humidity and rainfall on annual survival of adult little penguins *Eudyptula minor*  
627 in southeastern Australia. *International Journal of Biometeorology*:1–9. DOI: 10.1007/s00484-  
628 015-1119-2.
- 629 Garcia Borboroglu P., Boersma PD. 2013. *Penguins: Natural History and Conservation*. University of  
630 Washington Press.
- 631 Gartrell B., Agnew D., Alley M., Carpenter T., Ha HJ., Howe L., Hunter S., McInnes K., Munday R.,  
632 Wendi R., Melanie Y. 2016. Investigation of a mortality cluster in wild adult yellow-eyed  
633 penguins (*Megadyptes antipodes*) at Otago Peninsula, New Zealand. *Avian Pathology* 0:1–26.  
634 DOI: 10.1080/03079457.2016.1264568.
- 635 Gill JM., Darby JT. 1993. Deaths in yellow-eyed penguins (*Megadyptes antipodes*) on the Otago  
636 Peninsula during the summer of 1990. *New Zealand Veterinary Journal* 41:39–42.
- 637 Graczyk TK., Cranfield MR., Brossy JJ., Cockrem JF., Jouventin P., Seddon PJ. 1995. Detection of avian  
638 malaria infections in wild and captive penguins. *Journal of the Helminthological Society of*  
639 *Washington* 62:135–142.
- 640 Grémillet D., Boulinier T. 2009. Spatial ecology and conservation of seabirds facing global climate  
641 change: a review. *Marine Ecology Progress Series* 391:121–137.
- 642 Grosbois V., Gimenez O., Gaillard J., Pradel R., Barbraud C., Clobert J., Møller AP., Weimerskirch H.  
643 2008. Assessing the impact of climate variation on survival in vertebrate populations.  
644 *Biological Reviews* 83:357–399.
- 645 Guan B., Nigam S. 2008. Pacific sea surface temperatures in the twentieth century: An evolution-  
646 centric analysis of variability and trend. *Journal of Climate* 21:2790–2809. DOI:  
647 10.1175/2007JCLI2076.1.

- 648 Hawke DJ. 1989. Hydrology and near-surface nutrient distribution along the South Otago  
649 continental shelf, New Zealand, in summer and winter 1986. *New Zealand Journal of Marine  
650 and Freshwater Research* 23:411–420.
- 651 van Heezik Y. 1990. Seasonal, geographical, and age-related variations in the diet of the Yellow-eyed  
652 Penguin (*Megadyptes antipodes*). *New Zealand Journal of Zoology* 17:201–212.
- 653 van Heezik Y., Davis LS. 1990. Effects of food variability on growth rates, fledging sizes and  
654 reproductive success in the Yellow-eyed Penguin *Megadyptes antipodes*. *Ibis* 132:354–365.
- 655 Hocken AG. 2005. Necropsy findings in yellow-eyed penguins (*Megadyptes antipodes*) from Otago,  
656 New Zealand. *New Zealand Journal of Zoology* 32:1–8. DOI: 10.1080/03014223.2005.9518391.
- 657 Houston DM., Hocken AG. 2005. Diphtheritic stomatitis in yellow-eyed penguins. *New Zealand  
658 Journal of Zoology* 32:263–271.
- 659 Jones DOB., Yool A., Wei C-L., Henson SA., Ruhl HA., Watson RA., Gehlen M. 2014. Global reductions  
660 in seafloor biomass in response to climate change. *Global Change Biology* 20:1861–1872. DOI:  
661 10.1111/gcb.12480.
- 662 King SD. 2008. *Breeding success of Yellow-eyed penguins on Stewart Island and off-shore islands  
663 2003-2008*. unpublished report: Yellow-Eyed Penguin Trust, Dunedin, New Zealand.
- 664 Kriticos DJ., Webber BL., Leriche A., Ota N., Macadam I., Bathols J., Scott JK. 2012. CliMond: Global  
665 high-resolution historical and future scenario climate surfaces for bioclimatic modelling.  
666 *Methods in Ecology and Evolution* 3:53–64. DOI: 10.1111/j.2041-210X.2011.00134.x.
- 667 Lallas C., Ratz H., McEwan K., McConkey SD. 2007. Predation by New Zealand sea lions (*Phocarctos  
668 hookeri*) as a threat to the viability of yellow-eyed penguins (*Megadyptes antipodes*) at Otago  
669 Peninsula, New Zealand. *Biological Conservation* 135:235–246.

- 670 Limmer B., Becker PH. 2009. Improvement in chick provisioning with parental experience in a  
671 seabird. *Animal Behaviour* 77:1095–1101.
- 672 Mattern T., Ellenberg U., Houston DM., Davis LS. 2007. Consistent foraging routes and benthic  
673 foraging behaviour in yellow-eyed penguins. *Marine Ecology Progress Series* 343:295–306.
- 674 Mattern T., Ellenberg U., Houston DM., Lamare M., Davis LS., van Heezik Y., Seddon PJ. 2013. Straight  
675 line foraging in yellow-eyed penguins: new insights into cascading fisheries effects and  
676 orientation capabilities of marine predators. *PloS ONE* 8:e84381.
- 677 McClung MR., Seddon PJ., Massaro M., Setiawan AN. 2004. Nature-based tourism impacts on yellow-  
678 eyed penguins *Megadyptes antipodes*: does unregulated visitor access affect fledging weight  
679 and juvenile survival? *Biological Conservation* 119:279–285.
- 680 Mesnil B., Cotter J., Fryer RJ., Needle CL., Trenkel VM. 2009. A review of fishery-independent  
681 assessment models, and initial evaluation based on simulated data. *Aquatic Living Resources*  
682 22:207–216. DOI: 10.1051/alr/2009003.
- 683 Moore PJ., Wakelin MD. 1997. Diet of the Yellow-eyed penguin *Megadyptes antipodes*, South Island,  
684 New Zealand, 1991-1993. *Marine Ornithology* 25:17–29.
- 685 Nisbet ICT., Dann P. 2009. Reproductive performance of little penguins *Eudyptula minor* in relation  
686 to year, age, pair-bond duration, breeding date and individual quality. *Journal of Avian Biology*  
687 40:296–308.
- 688 Oliver ECJ., Wotherspoon SJ., Chamberlain MA., Holbrook NJ. 2014. Projected Tasman Sea Extremes  
689 in Sea Surface Temperature through the Twenty-First Century. *Journal of Climate* 27:1980–  
690 1998.
- 691 Opdam P., Wascher D. 2004. Climate change meets habitat fragmentation: linking landscape and  
692 biogeographical scale levels in research and conservation. *Biological Conservation* 117:285–



- 693           297.
- 694   Parmesan C., Yohe G. 2003. A globally coherent fingerprint of climate change impacts across natural  
695           systems. *Nature* 421:37–42. DOI: 10.1038/nature01286.
- 696   Peacock L., Paulin M., Darby JT. 2000. Investigations into the climate influence on population  
697           dynamics of yellow-eyed penguins *Megadyptes antipodes*. *New Zealand Journal of Zoology*  
698           27:317–325.
- 699   Perriman L., Houston DM., Steen H., Johannesen E. 2000. Climate fluctuation effects on breeding of  
700           blue penguins (*Eudyptula minor*). *New Zealand Journal of Zoology* 27:261–267. DOI:  
701           10.1080/03014223.2000.9518234.
- 702   Ratz H., Murphy B. 1999. Effects of habitat and introduced mammalian predators on the breeding  
703           success of Yellow-eyed Penguins *Megadyptes antipodes*, South Island, New Zealand. *Pacific*  
704           *Conservation Biology* 5:16–27.
- 705   Rawlence NJ., Perry GLW., Smith IWG., Scofield RP., Tennyson AJD., Matisoo-Smith EA., Boessenkool  
706           S., Austin JJ., Waters JM. 2015. Radiocarbon-dating and ancient DNA reveal rapid replacement  
707           of extinct prehistoric penguins. *Quaternary Science Reviews* 112:59–65. DOI:  
708           10.1016/j.quascirev.2015.01.011.
- 709   Richard Y., Abraham ER. 2015. *Assessment of the risk of commercial fisheries to New Zealand*  
710           *seabirds, 2006–07 to 2012–13*. Wellington, New Zealand. Available at  
711           <https://www.mpi.govt.nz/document-vault/10523>
- 712   Richdale LE. 1949. *A study of a group of penguins of known age*. Dunedin, NZ: Otago Daily Times and  
713           Witness Newspapers Company.
- 714   Richdale LE. 1951. *Sexual behavior in penguins*. Lawrence, USA: University of Kansas Press.

- 715 Richdale LE. 1957. *A population study of penguins*. Oxford, UK: Clarendon Press.
- 716 Robertson H., Dowding J., Elliott G., Hitchmough R., Miskelly C., O'Donnell C., Powlesland R., Sagar P.,  
717 Scofield R., Taylor G. 2013. *Conservation Status of New Zealand Birds, 2012*. New Zealand  
718 Threat Classification Series 4. Department of Conservation, Wellington, New Zealand
- 719 Seddon PJ., Ellenberg U., van Heezik Y. 2013. Yellow-eyed penguin (*Megadyptes antipodes*). In:  
720 Garcia Borboroglu P, Boersma PD eds. *Penguins: Natural History and Conservation*. Seattle &  
721 London: University of Washington Press, 91–110.
- 722 Sekercioglu CH., Schneider SH., Fay JP., Loarie SR. 2008. Climate change, elevational range shifts,  
723 and bird extinctions. *Conservation Biology* 22:140–150.
- 724 Sexton JP., McIntyre PJ., Angert AL., Rice KJ. 2009. Evolution and ecology of species range limits.  
725 *Annual Review of Ecology, Evolution, and Systematics* 40:415–436. DOI:  
726 10.1146/annurev.ecolsys.l.
- 727 Shumway SE., Allen SM., Boersma PD. 2003. Marine birds and harmful algal blooms: Sporadic  
728 victims or under-reported events? *Harmful Algae* 2:1–17. DOI: 10.1016/S1568-  
729 9883(03)00002-7.
- 730 Sitas N., Baillie JEM., Isaac NJB. 2009. What are we saving? Developing a standardized approach for  
731 conservation action. *Animal Conservation* 12:231–237. DOI: 10.1111/j.1469-  
732 1795.2009.00244.x.
- 733 Stocker TF. 2014. *Climate change 2013: the physical science basis: Working Group I contribution to*  
734 *the Fifth assessment report of the Intergovernmental Panel on Climate Change*. Cambridge  
735 University Press.
- 736 Sturrock HJW., Tompkins DM. 2007. Avian malaria (*Plasmodium* spp) in yellow-eyed penguins:

- 737 Investigating the cause of high seroprevalence but low observed infection. *New Zealand*  
738 *Veterinary Journal* 55:158–160. DOI: 10.1080/00480169.2007.36761.
- 739 Takasuka A., Oozeki Y., Kubota H. 2008. Multi-species regime shifts reflected in spawning  
740 temperature optima of small pelagic fish in the western North Pacific. *Marine Ecology Progress*  
741 *Series* 360:211.
- 742 Tang S., Chen L. 2002. Density-dependent birth rate, birth pulses and their population dynamic  
743 consequences. *Journal of Mathematical Biology* 44:185–199.
- 744 Tavecchia G., Tenan S., Pradel R., Igual JM., Genovart M., Oro D. 2016. Climate-driven vital rates do  
745 not always mean climate-driven population. *Global Change Biology* 22:3960–3966. DOI:  
746 10.1111/gcb.13330.
- 747 Thomas CD., Cameron A., Green RE., Bakkenes M., Beaumont LJ., Collingham YC., Erasmus BFN., de  
748 Siqueira MF., Grainger A., Hannah L., Hughes L., Huntley B., van Jaarsveld AS., Midgley GF.,  
749 Miles L., Ortega-Huerta MA., Townsend Peterson A., Phillips OL., Williams SE. 2004. Extinction  
750 risk from climate change. *Nature* 427:145–148.
- 751 Thuiller W., Lavorel S., Araújo MB. 2005. Niche properties and geographical extent as predictors of  
752 species sensitivity to climate change. *Global Ecology and Biogeography* 14:347–357.
- 753 Tisdell C. 2007. *Valuing the Otago Peninsula: The Economic Benefits of Conservation*. Working  
754 Papers on Economics, Ecology and the Environment, Vol 145. University of Queensland,  
755 Brisbane, Australia.
- 756 Tompkins DM., Byrom AE., Pech RP. 2013. Predicted responses of invasive mammal communities to  
757 climate-related changes in mast frequency in forest ecosystems. *Ecological Applications*  
758 23:1075–1085. DOI: 10.1890/12-0915.1.

- 759 Trathan PN., García-Borboroglu P., Boersma D., Bost C., Crawford RJM., Crossin GT., Cuthbert RJ.,  
760 Dann P., Davis LS., De La Puente S. 2015. Pollution, habitat loss, fishing, and climate change as  
761 critical threats to penguins. *Conservation Biology* 29:31–41.
- 762 Waters JM., Grosser S. 2016. Managing shifting species: Ancient DNA reveals conservation  
763 conundrums in a dynamic world. *BioEssays* 38:1177–1184. DOI: 10.1002/bies.201600044.
- 764 Wilson K-J. 2004. *Flight of the Huia: Ecology and conservation of New Zealand's frogs, reptiles, birds*  
765 *and mammals*. Canterbury University Press Christchurch.
- 766 Zimmer I., Ropert-Coudert Y., Kato A., Ancel A., Chiaradia A. 2011. Does foraging performance  
767 change with age in female little penguins (*Eudyptula minor*)? *PLoS ONE* 6. DOI:  
768 10.1371/journal.pone.0016098.
- 769

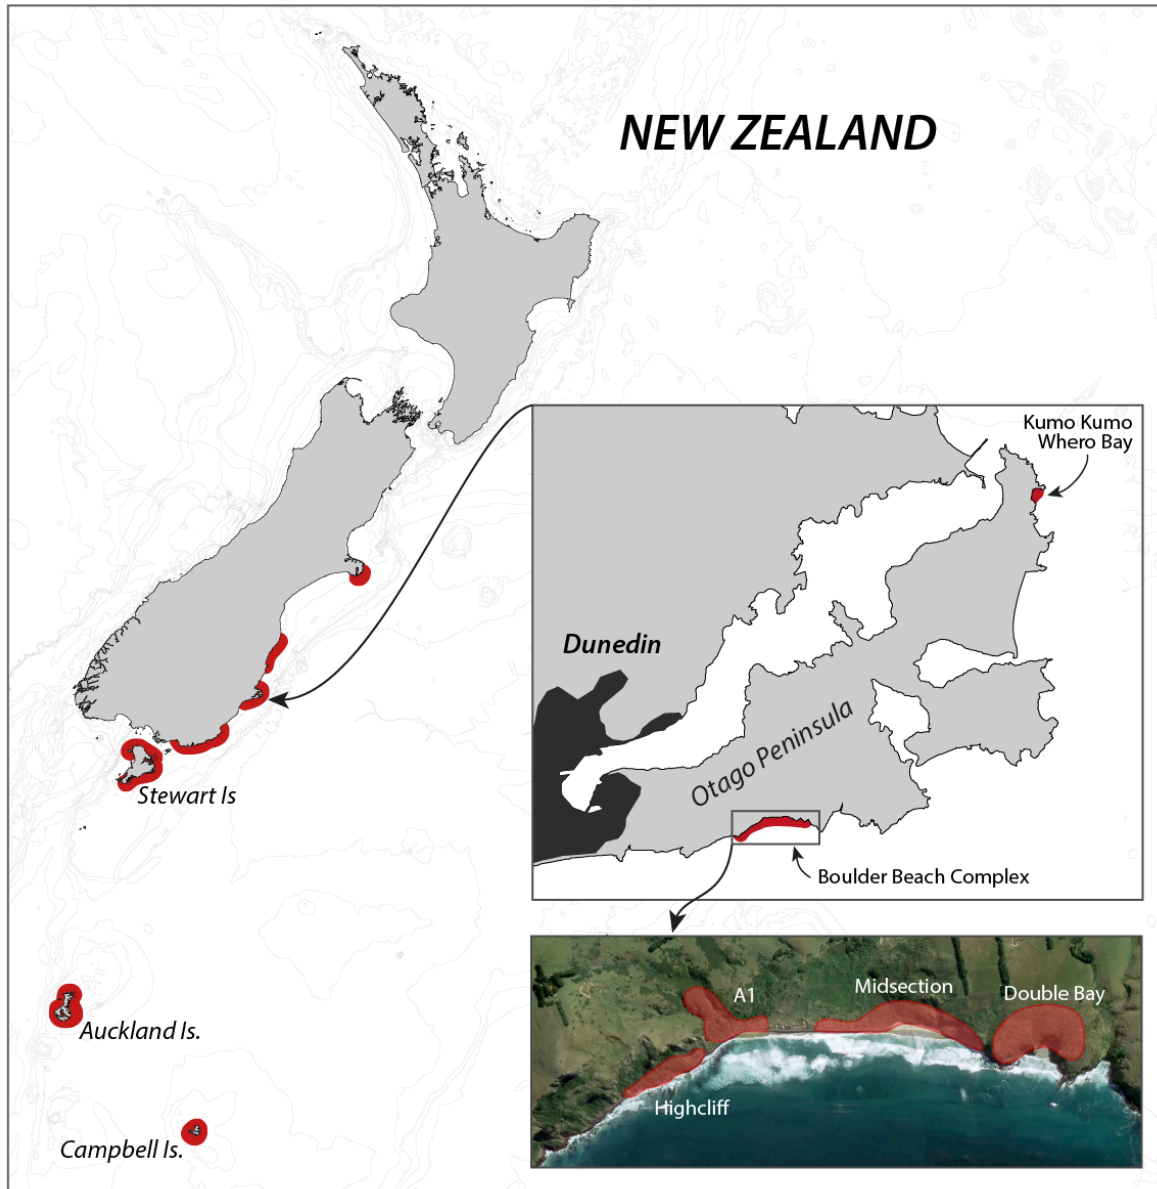

770

771 **Figure 1.** Overview of the breeding range of Yellow-eyed penguins, detail of the Otago  
772 Peninsula with an aerial view of the Boulder Beach Complex (henceforth Boulder Beach)  
773 with outlines indicating the locations of the four main monitoring plots. The inset map also  
774 indicates Kumo Kumo Whero Bay, the location of the historic population study conducted  
775 from the 1930s to 1950s.

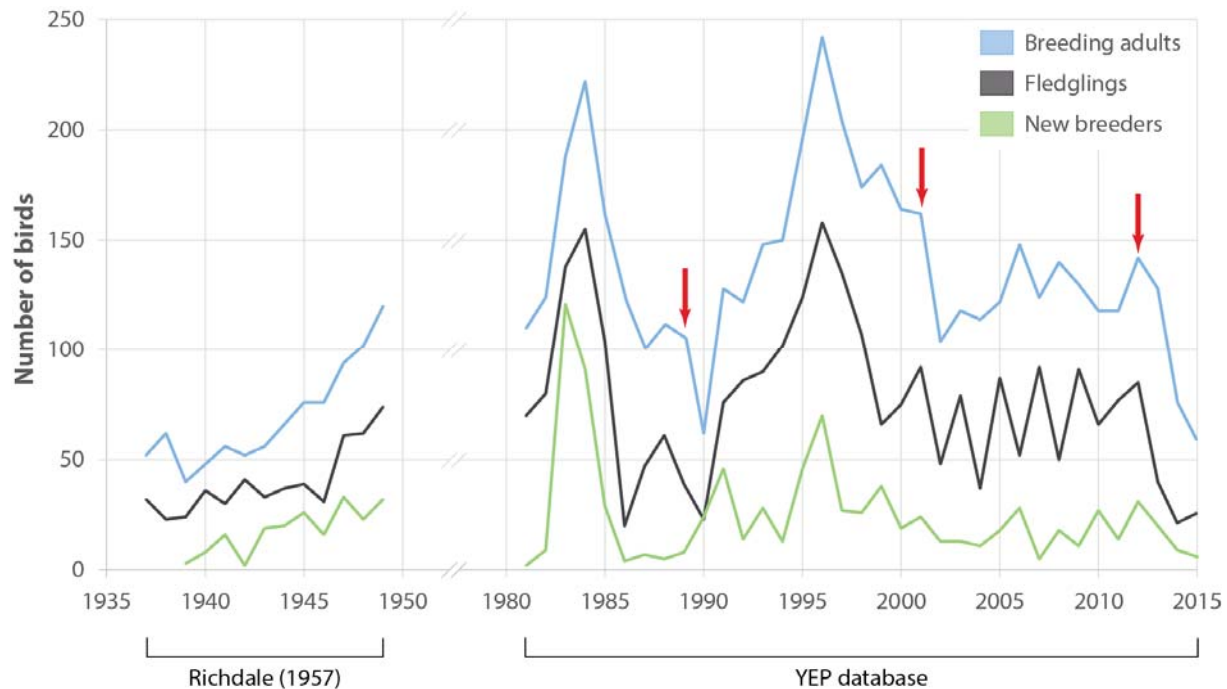

776

777 **Figure 2.** Observed penguin numbers at Kumo Kumo Whero 1937-1948 (from data  
778 published in Richdale 1957, see Methods for details) and at the Boulder Beach complex  
779 1982-2015 as extracted from the Yellow-eyed penguin database. 'New breeders' represents  
780 the portion of all 'breeding adults' that were recorded as breeders for the first time. Red  
781 arrows indicate years with observed die-off events affecting adult breeders. Note that as  
782 some sections of the Boulder Beach complex were not monitored in all years, data for the  
783 years 1986-1989 were adjusted by adding the mean proportion these areas contributed to  
784 the total count in all other years.

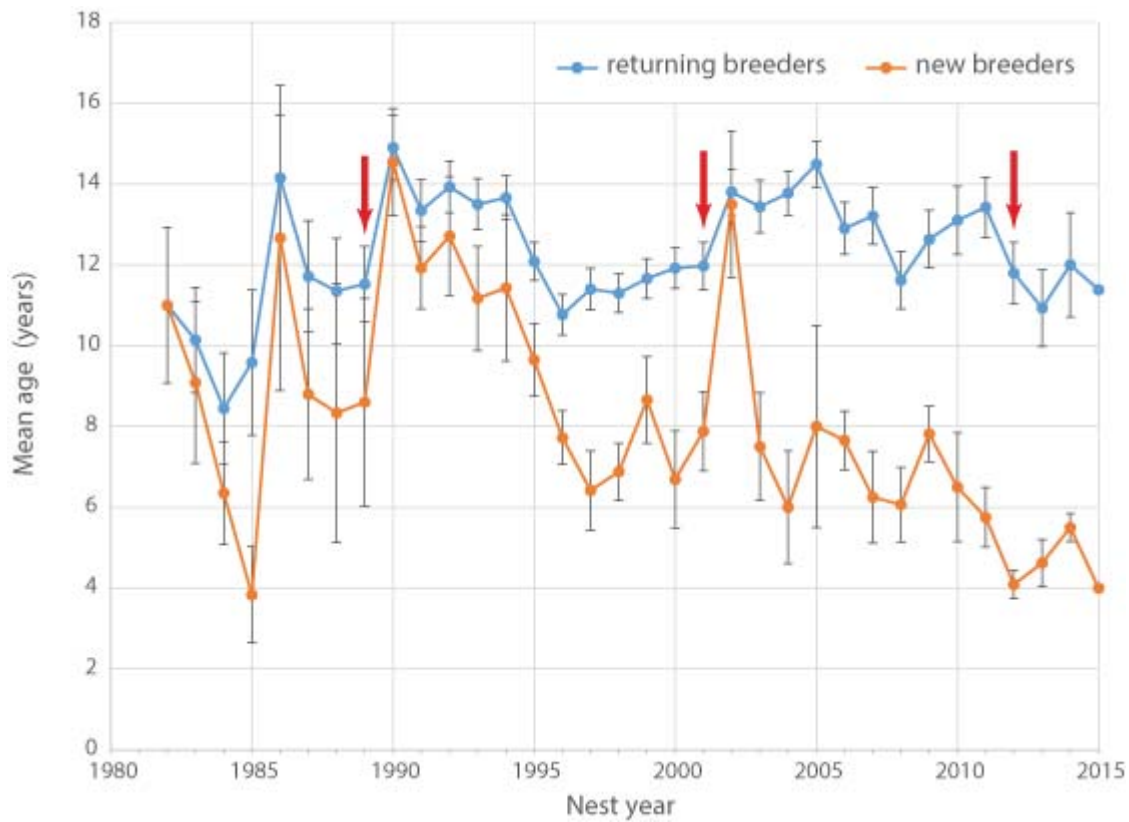

785

786 **Figure 3.** Average age of breeding Yellow-eyed penguins active at Boulder Beach between  
787 1982 and 2015. Red arrows indicate years with observed die-off events affecting adult  
788 breeders.

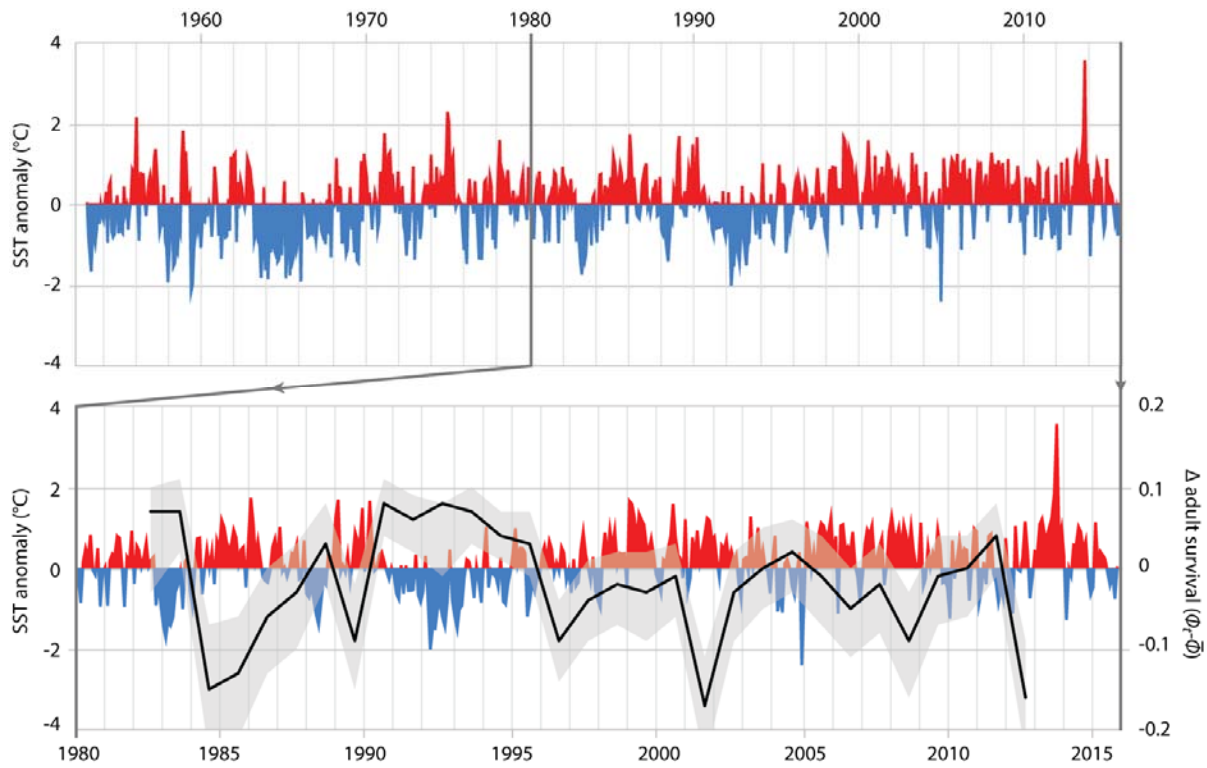

789

790 **Figure 4.** Top graph: Local Sea Surface Temperature anomalies recorded at Portobello  
791 Marine Lab, Otago Peninsula, between 1953 and 2016. Bottom graph: detail of SST  
792 anomalies 1980-2016 and associated deviance (black line: mean; grey area: 95% credible  
793 interval) in survival of adult Yellow-eyed penguins as determined from a MR recapture  
794 model.



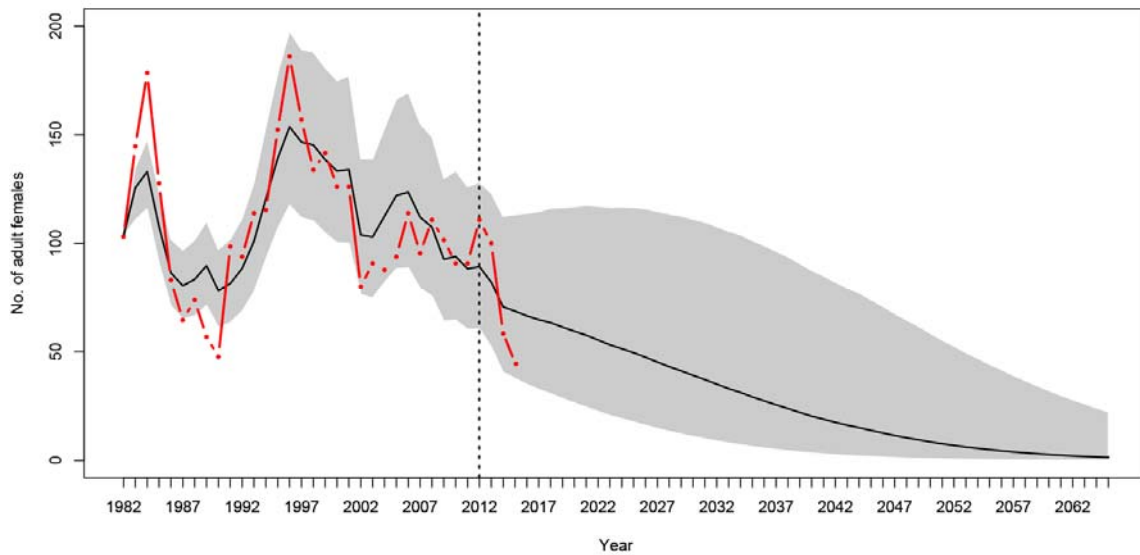

795

796 **Figure 5.** Population projections for Yellow-eyed penguins at Boulder Beach, Otago  
797 Peninsula. The graphs show the observed (red line) and estimated (black line) number  
798 of female penguins, and associated 95% credible interval (grey area), as derived from  
799 the population model. The dashed vertical line indicates the last year used to  
800 parameterise the MR model and the starting year of the simulation. Population  
801 projections were modelled using survival rate estimates until 2012; beyond this year  
802 estimates get increasingly unreliable because these are based on data about individual  
803 absence from breeding rather than from reported mortalities (see 'Methods').

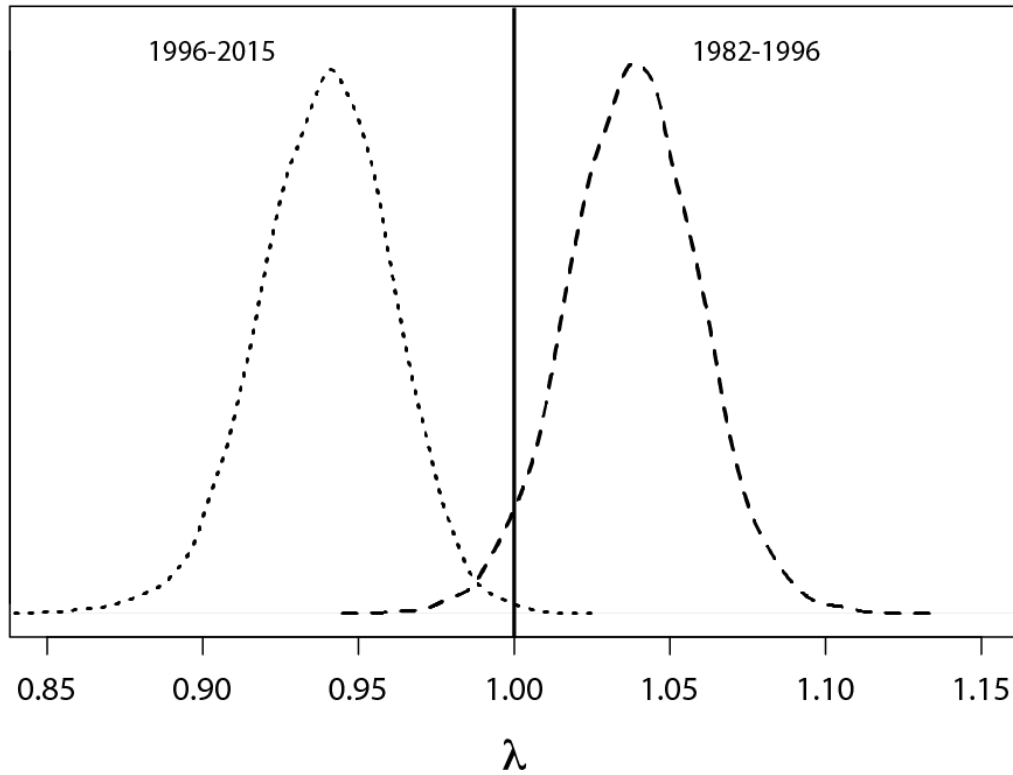

804

805 **Figure 6.** Probability density functions for deterministic annual population growth rates  
806 derived from survival rates that were rescaled for periods of cooler (1982-1996) and  
807 warmer (1996-2014) than average sea surface temperatures.

808 **Table 1.** Description of basic environmental parameters used for the development of a  
 809 YEP population model.

| <b>Parameter</b>                                                | <b>shorthand</b>   | <b>Station</b>                                                          |
|-----------------------------------------------------------------|--------------------|-------------------------------------------------------------------------|
| Total Rainfall (mm)                                             | total_rainfall     | Southern Reservoir<br>(National Climate<br>database, CliFlo ID<br>5400) |
| Wet Days - Number Of<br>Days With 1mm Or More<br>Of Rain (days) | wet_days           | Southern Reservoir<br>(5400)                                            |
| Maximum 1-Day Rainfall -<br>9am To 9am Local Time               | max_1day_rain      | Dunedin, Musselburgh<br>(5402)                                          |
| Mean Air Temperature                                            | mean_air_temp      | Dunedin, Musselburgh<br>(5402)                                          |
| Mean Daily Minimum Air<br>Temperature                           | daily_min_temp     | Dunedin, Musselburgh<br>(5402)                                          |
| Days Of Wind Gusts >=33<br>Knots                                | days_wind_gusts_33 | Dunedin, Musselburgh<br>(5402)                                          |
| Sea Surface Temperature<br>anomaly                              | sst_anomaly        | Portobello Marine Lab,<br>University of Otago                           |

810 **Table 2.** Parameter estimates from the Bayesian mark-recapture model.  $\bar{\Phi}$  indicates  
811 estimated annual survival rates,  $\sigma^2$  stands for the temporal variance of the stage-specific  
812 annual survival. Refer to ESM1 for details.

| Parameters                                 | Median | Credible interval |       |
|--------------------------------------------|--------|-------------------|-------|
|                                            |        | 2.5%              | 97.5% |
| $\bar{\Phi}_{chicks}$                      | 0.124  | 0.077             | 0.189 |
| $\sigma^2_{chicks}$                        | 1.877  | 1.001             | 3.847 |
| $\sigma^2_{chicks}$ (on probability scale) | 0.021  | 0.009             | 0.065 |
| $\bar{\Phi}_{adults}$                      | 0.872  | 0.832             | 0.904 |
| $\sigma^2_{adults}$                        | 0.732  | 0.414             | 1.398 |
| $\sigma^2_{adults}$ (on probability scale) | 0.009  | 0.005             | 0.021 |

813 **Table 3a.** Estimated effect size for fledgling survival ( $\beta_{\text{fledlings}}$ ); PVE: percentage of  
 814 variance in fledgling survival explained by each covariate. Note, that negative values  
 815 resulted from models that estimated slightly higher (or less precise) variance in  
 816 fledgling survival, as it would result for the model without covariate. Except for  
 817 covariate 2, 3, 4 and 15 all variables were standardized before fitted to the MR model.

| ID | Covariate                  | Median | Credible interval |        | PVE  |
|----|----------------------------|--------|-------------------|--------|------|
|    |                            |        | 2.5%              | 97.5%  |      |
| 1  | days_wind_gusts_33_annual  | 0.850  | 0.377             | 1.329  | 33.2 |
| 2  | sst_anomaly_austral        | -1.967 | -3.148            | -0.964 | 33.2 |
| 3  | sst_anomaly_minus_1yr      | -1.516 | -2.649            | -0.392 | 24.8 |
| 4  | sst_anomaly_mar_june       | -0.970 | -1.845            | -0.111 | 17.4 |
| 5  | days_wind_gusts_33_mar_may | 0.696  | 0.198             | 1.241  | 16.5 |
| 6  | daily_min_temp_annual      | -0.644 | -1.190            | -0.143 | 15.4 |
| 7  | mean_air_temp_annual       | -0.590 | -1.167            | -0.102 | 12.4 |
| 8  | daily_min_temp_mar_may     | -0.303 | -0.829            | 0.204  | 0.7  |
| 9  | mean_air_temp_mar_may      | -0.304 | -0.850            | 0.190  | 0.2  |
| 10 | total_rainfall_may_may     | -0.254 | -0.823            | 0.296  | -2.3 |
| 11 | max_1day_rain_mar_may      | -0.250 | -0.835            | 0.318  | -3.3 |
| 12 | total_rainfall_annual      | -0.260 | -0.841            | 0.316  | -3.5 |
| 13 | max_1day_rain_annual       | -0.167 | -0.738            | 0.394  | -5.2 |
| 14 | wet_days_mar_may           | -0.141 | -0.702            | 0.431  | -5.6 |
| 15 | sst_anomaly_minus_2yr      | -0.217 | -1.451            | 1.045  | -5.6 |
| 16 | wet_days_annual            | 0.073  | -0.461            | 0.623  | -6.7 |

818 **Table 3b.** Estimated effect size for adult survival ( $\beta_{adults}$ ); PVE: percentage of variance in  
 819 adult survival explained by each covariate. Note, that negative values resulted from  
 820 models that estimated slightly higher (or less precise) variance in adult survival, as it  
 821 would result for the model without covariate. Except for covariate 1, 4, 5 and 14 all  
 822 variables were standardized before fitted to the MR model.

| ID | Covariate                  | Median | Credible interval |        | PVE  |
|----|----------------------------|--------|-------------------|--------|------|
|    |                            |        | 2.5%              | 97.5%  |      |
| 1  | sst_anomaly_austral        | -1.267 | -1.925            | -0.631 | 36.8 |
| 2  | mean_air_temp_annual       | -0.529 | -0.817            | -0.251 | 34.4 |
| 3  | daily_min_temp_annual      | -0.516 | -0.796            | -0.227 | 34.4 |
| 4  | sst_anomaly_mar_june       | -0.808 | -1.329            | -0.310 | 26.2 |
| 5  | sst_anomaly_minus_1yr      | -1.056 | -1.719            | -0.406 | 25.7 |
| 6  | days_wind_gusts_33_annual  | 0.377  | 0.075             | 0.690  | 16.5 |
| 7  | days_wind_gusts_33_mar_may | 0.350  | 0.052             | 0.666  | 12.8 |
| 8  | daily_min_temp_mar_may     | -0.214 | -0.537            | 0.088  | 2.0  |
| 9  | total_rainfall_may_may     | -0.146 | -0.461            | 0.193  | 1.0  |
| 10 | mean_air_temp_mar_may      | -0.181 | -0.513            | 0.140  | -0.3 |
| 11 | wet_days_mar_may           | -0.113 | -0.434            | 0.207  | -1.0 |
| 12 | max_1day_rain_mar_may      | -0.098 | -0.416            | 0.234  | -2.0 |
| 13 | max_1day_rain_annual       | 0.112  | -0.206            | 0.435  | -2.2 |
| 14 | sst_anomaly_minus_2yr      | -0.055 | -0.867            | 0.720  | -3.1 |
| 15 | wet_days_annual            | 0.064  | -0.275            | 0.393  | -3.8 |
| 16 | total_rainfall_annual      | 0.057  | -0.268            | 0.391  | -4.0 |

823 **Table 4.** Results of the Gibbs Variable Selection. 0 and 1 indicate whether each covariate  
 824 is not included or included in the model, respectively. The MR considers covariates  
 825 ‘sst\_anomaly\_austral’ for fledgling (A) and adult survival (C),  
 826 ‘days\_wind\_gusts\_33\_annual’ (B) and ‘mean\_air\_temp\_annual’ (D). For a detailed  
 827 description of the GVS refer to ESM4.

|                      | <b>Model configuration</b> |          |                       |          | <b>p(M<sub>i</sub> y)</b> |
|----------------------|----------------------------|----------|-----------------------|----------|---------------------------|
|                      | <b>Fledgling survival</b>  |          | <b>Adult survival</b> |          |                           |
| <b>M<sub>i</sub></b> | <b>A</b>                   | <b>B</b> | <b>C</b>              | <b>D</b> |                           |
| 1                    | 1                          | 0        | 1                     | 0        | 0.42                      |
| 2                    | 0                          | 1        | 1                     | 0        | 0.13                      |
| 3                    | 1                          | 1        | 1                     | 0        | 0.12                      |
| 4                    | 1                          | 0        | 0                     | 1        | 0.09                      |
| 5                    | 0                          | 1        | 0                     | 1        | 0.06                      |
| 6                    | 0                          | 0        | 0                     | 0        | 0.04                      |
| 7                    | 1                          | 0        | 0                     | 0        | 0.03                      |
| 8                    | 0                          | 1        | 0                     | 0        | 0.03                      |
| 9                    | 1                          | 1        | 0                     | 0        | 0.02                      |
| 10                   | 0                          | 0        | 1                     | 0        | 0.01                      |
| 11                   | 0                          | 0        | 0                     | 1        | 0.01                      |
| 12                   | 1                          | 1        | 0                     | 1        | 0.01                      |
| 13                   | 0                          | 0        | 1                     | 1        | 0                         |
| 14                   | 1                          | 0        | 1                     | 1        | 0                         |
| 15                   | 0                          | 1        | 1                     | 1        | 0                         |
| 16                   | 1                          | 1        | 1                     | 1        | 0                         |

828
